# Supplementary material for: Pathogen-specific Actinium-225 and Lutetium-177 labeled antibodies, as well as unbound radionuclide treatment show antimicrobial potential on a biofilm-associated implant infection - initial in vivo experience
Source: Research Square preprint supplement (doi:10.21203/rs.3.rs-7240967/v1), 2025-08-07
Supplement: Supplementary file 1 [file 6115b632ab6f4a8394efc342.docx]

**Supplement file**

**
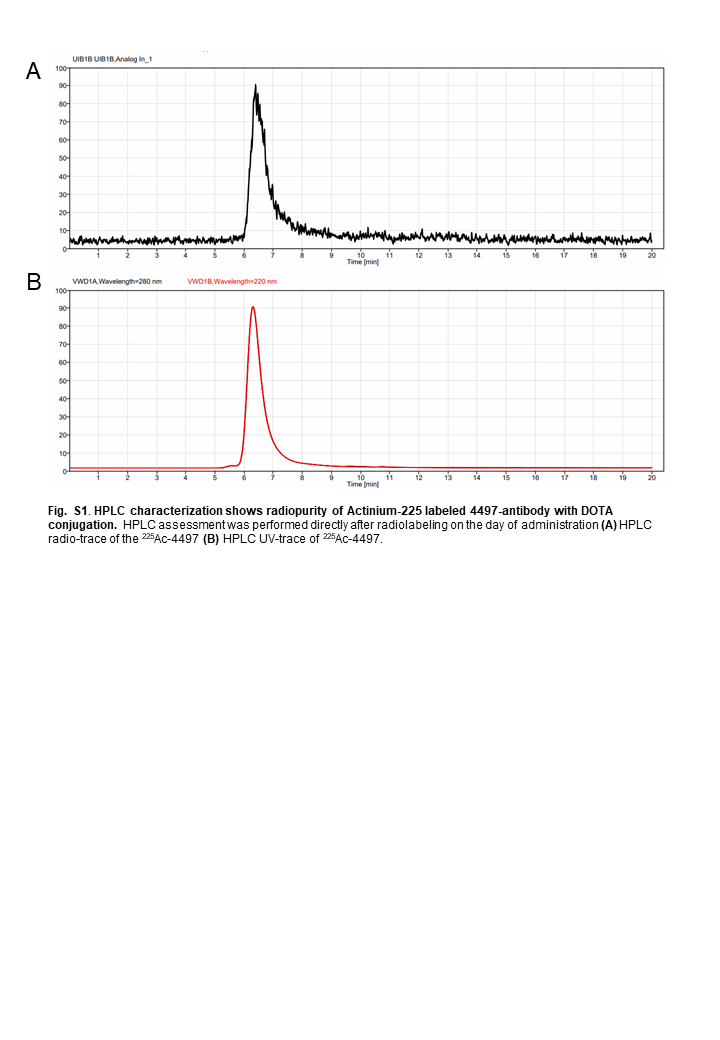
**

**
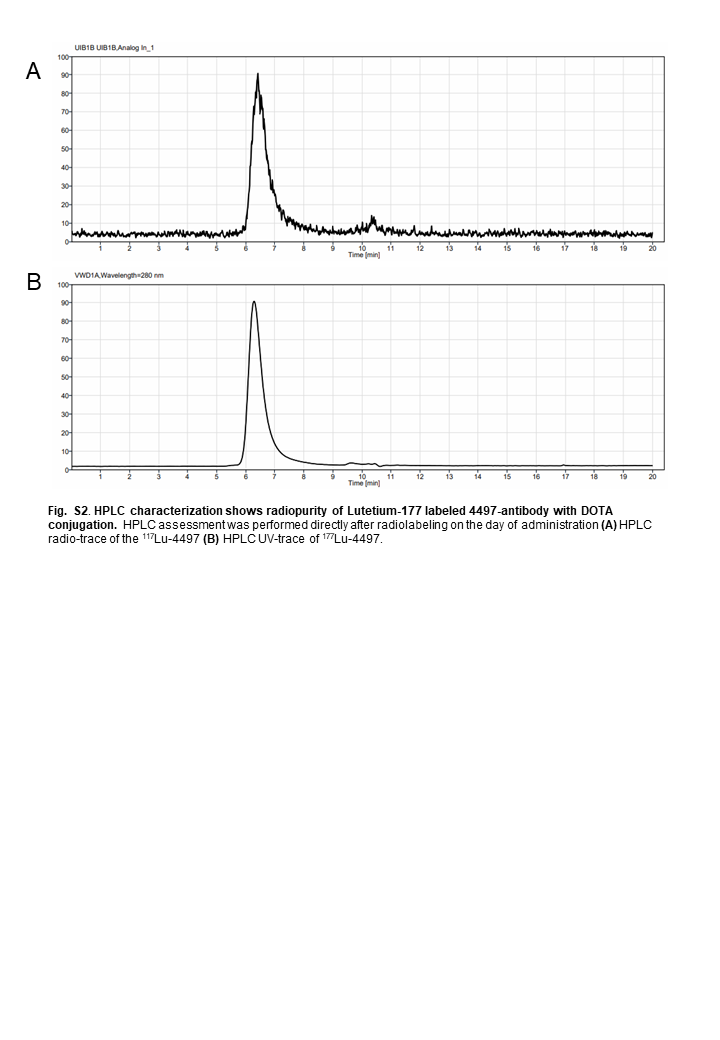
**

**
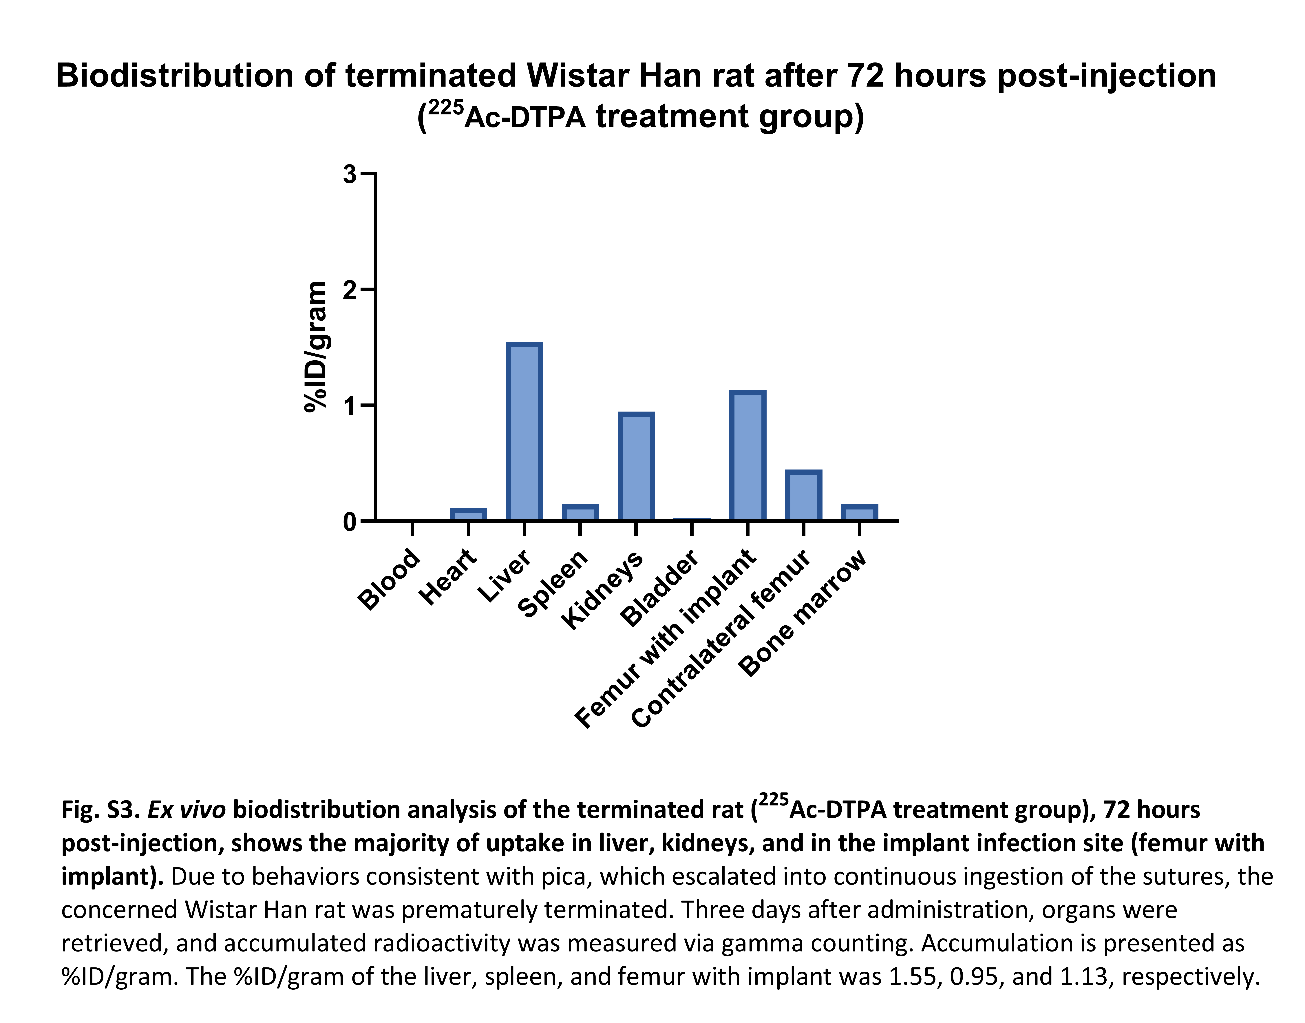
**

**Table S4. Actinium-225 treatment groups (225Ac-4497 and 225Ac-DTPA). The Individual mean Colony Forming units (CFU) after seven days follow-up.**

|  | Implant (CFU) | | | Bone (CFU) | | |
| --- | --- | --- | --- | --- | --- | --- |
|  | Rat #1 | Rat #2 | Rat #3 | Rat #1 | Rat #2 | Rat #3 |
| *0 kBq/kg (n=3)* | *1.7 x 106* | *8.2 x 105* | *1.95 x 106* | *7.0 x 106* | *3.4 x 108* | *6.5 x 106* |
| *184 kBq/kg (n=3* | *3.15 x 105* | *3.45 x 105* | *3.3 x 105* | *1.13 x 107* | *7.1 x 106* | *6.7 x 106* |
| *372 kBq/kg (n=3)* | *5.0 x 104* | *4.95 x 105* | *6.65 x 105* | *1.86 x 106* | *5.01 x 107* | *5.1 x 107* |
| *740 kBq/kg (n=3)* | *7.3 x 104* | *1.29 x 106* | *4.9 x 105* | *2.6 x 106* | *8.6 x 107* | *7.07 x 105* |
| *225Ac-DTPA (740 kBq/kg) (n=2)* | *1.64 x 105* | *4.3 x 105* | *excluded* | *1.25 x 106* | *3.9 x 106* | *excluded* |
| *After seven days of follow-up, both implant and homogenized bone were sonicated for 10 minutes. Tenfold serial dilutions were cultured on Colombia Blood Agar plates in duplicate. CFUs were counted after overnight incubation in a 37°C stove. Note: Due to continuous biting of the surgical wound, rat #3 of the 225Ac-DTPA (740 kBq/kg) treatment group was terminated after 72 hours post-injection.* | | | | | | |

**Table S5. Lutetium-177 treatment groups (177Lu-4497 and 177Lu-DTPA). The individual mean Colony Forming units (CFU) after seven days of follow-up.**

|  | Implant (CFU) | | | Bone (CFU) | | |
| --- | --- | --- | --- | --- | --- | --- |
|  | Rat #1 | Rat #2 | Rat #3 | Rat #1 | Rat #2 | Rat #3 |
| *0 kBq/kg (n=3)* | *1.7 x 106* | *8.2 x 105* | *1.95 x 106* | *7.0 x 106* | *3.4 x 108* | *6.5 x 106* |
| *112 MBq/kg (n=3)* | *6.15 x 105* | *7.3 x 105* | *3.15 x 105* | *6.2 x 107* | *3.8 x 107* | *9.6 x 107* |
| *184 MBq/kg (n=3)* | *1.5 x 105* | *4.45 x 105* | *5.3 x 105* | *6.7 x 107* | *1.47 x 105* | *5.5 x 107* |
| *260 MBq/kg (n=3)* | *4.9 x 105* | *5.0 x 105* | *6.45 x 105* | *5.4 x 107* | *1.07 x 107* | *4.0 x 107* |
| *177Lu-DTPA (260 MBq/kg) (n=3)* | *5.4 x 105* | *7.25 x 105* | *3.4 x 105* | *5.4 x 108* | *1.4 x 107* | *6.3 x 106* |
| *After seven days of follow-up, both implant and homogenized bone were sonicated for 10 minutes. Tenfold serial dilutions were cultured on Colombia Blood Agar plates in duplicate. CFUs were counted after overnight incubation 37°C stove.* | | | | | | |
